# Supplementary material for: Discrimination of Brassica juncea Varieties Using Visible Near-Infrared (Vis-NIR) Spectroscopy and Chemometrics Methods
Source: MDPI journal article supplement (doi:10.3390/ijms232112809), 2022-10-24
Supplement: s1 [file s1]

**Table S1.** Confusion matrix from the execution with the best accuracy in cotyledon stage of four *B. juncea* varieties (**Deep learning/SNV**).

|              | Chungot | Dolsangot | Earlchungot | Jukgot | class precision |
|--------------|---------|-----------|-------------|--------|-----------------|
| Chungot      | 36      | 2         | 1           | 0      | 92.31%          |
| Dolsangot    | 5       | 57        | 2           | 2      | 86.36%          |
| Earlchungot  | 0       | 13        | 41          | 5      | 69.49%          |
| Jukgot       | 0       | 0         | 2           | 124    | 98.41%          |
| class recall | 87.80%  | 79.17%    | 89.13%      | 94.66% |                 |

**Table S2.** Confusion matrix from the execution with the best accuracy in 1-2 leaf stage of four *B. juncea* varieties (**SVM/SNV**).

|              | Chungot | Dolsangot | Earlchungot | Jukgot  | class precision |
|--------------|---------|-----------|-------------|---------|-----------------|
| Chungot      | 5       | 1         | 5           | 0       | 45.45%          |
| Dolsangot    | 55      | 198       | 55          | 0       | 64.29%          |
| Earlchungot  | 10      | 7         | 20          | 0       | 54.05%          |
| Jukgot       | 0       | 0         | 0           | 211     | 100.00%         |
| class recall | 7.14%   | 96.12%    | 25.00%      | 100.00% |                 |

**Table S3.** Confusion matrix from the execution with the best accuracy in 3-4 leaf stage of four *B. juncea* varieties (Deep learning/SNV).

|              | Chungot | Dolsangot | Earlchungot | Jukgot | class precision |
|--------------|---------|-----------|-------------|--------|-----------------|
| Chungot      | 165     | 0         | 27          | 43     | 70.21%          |
| Dolsangot    | 0       | 453       | 0           | 0      | 100.00%         |
| Earlchungot  | 4       | 0         | 88          | 6      | 89.80%          |
| Jukgot       | 21      | 0         | 9           | 562    | 94.93%          |
| class recall | 86.84%  | 100.00%   | 70.97%      | 91.98% |                 |

**Table S4.** Confusion matrix from the execution with the best accuracy in 5-6 leaf stage of four *B. juncea* varieties (Deep learning/SNV).

|              | Chungot | Dolsangot | Earlchungot | Jukgot  | class precision |
|--------------|---------|-----------|-------------|---------|-----------------|
| Chungot      | 202     | 0         | 0           | 0       | 100.00%         |
| Dolsangot    | 0       | 236       | 0           | 0       | 100.00%         |
| Earlchungot  | 0       | 0         | 207         | 0       | 100.00%         |
| Jukgot       | 0       | 0         | 0           | 210     | 100.00%         |
| class recall | 100.00% | 100.00%   | 100.00%     | 100.00% |                 |
